# Supplementary material
Source: PubMed Central journal article supplement (PMC4868785)
Supplement: NIHMS763938-supplement-1.pdf [file NIHMS763938-supplement-1.pdf]

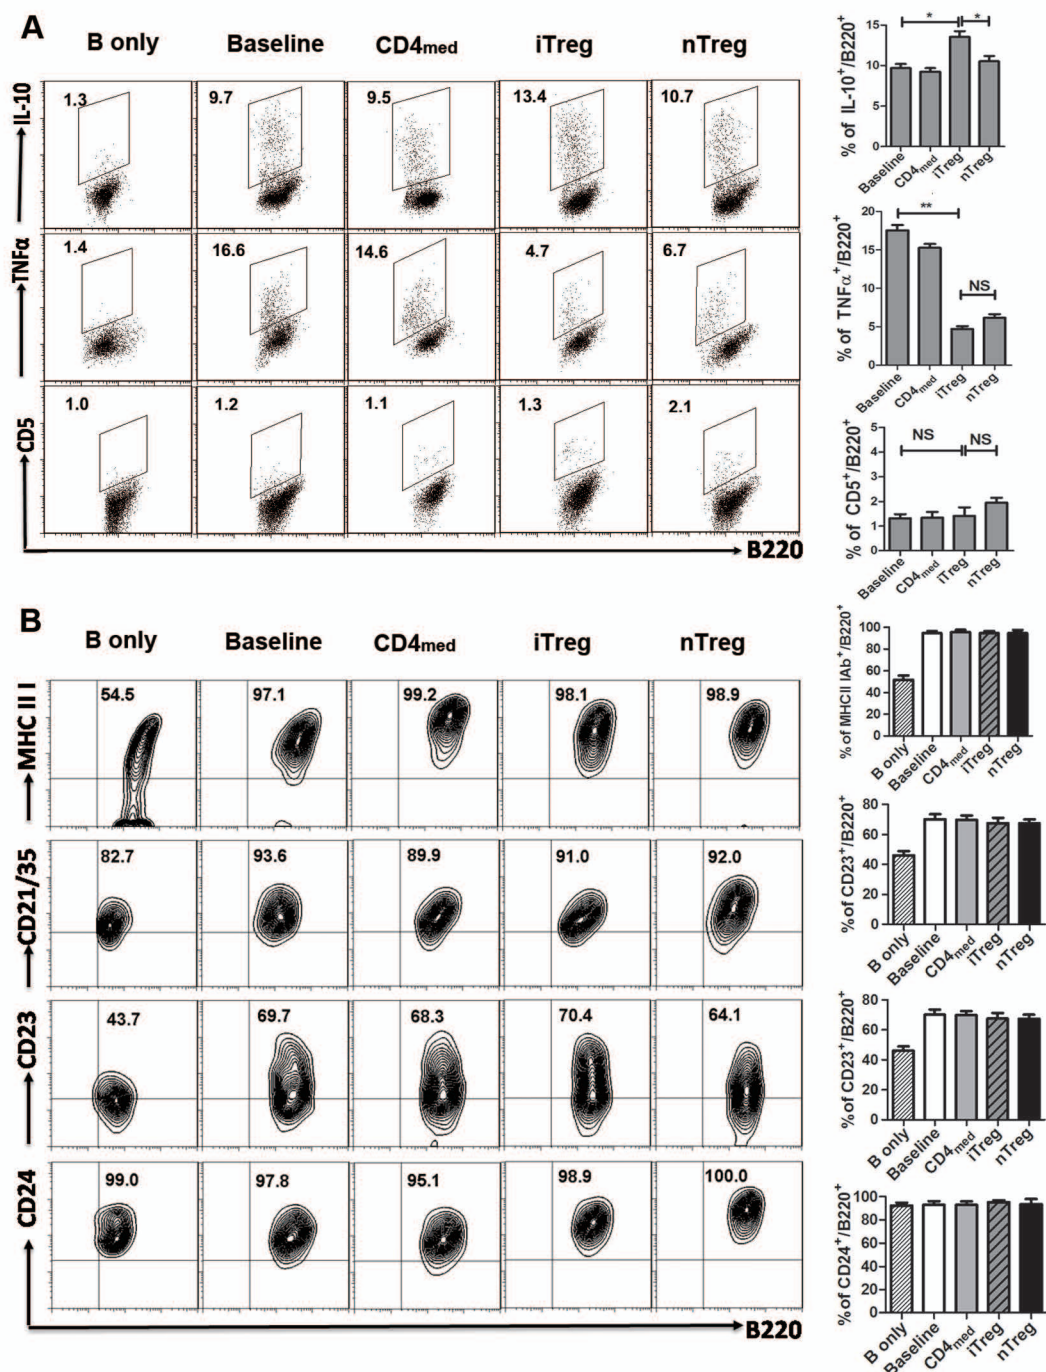

**FIGURE S1.** Implicate of Treg subsets on the phenotypes and cytokine production by B cells. **(A and B)** B cells were stimulated with (Baseline) or without LPS (2  $\mu$ g/ml) (B only) in the presence or absence of nTreg, iTreg and CD4<sub>med</sub> (ratio of T to B cells was 1:2 to 1:4). IL-10, TNF $\alpha$ , CD5, MHC-II, CD21/35, CD23 and CD24 expression by B cells was determined by flow cytometry after culture days 2. The data indicate the Mean  $\pm$  SEM of 3 separated experiments (\* $p$ <0.05, \*\* $p$ <0.01, baseline vs. Treg group).

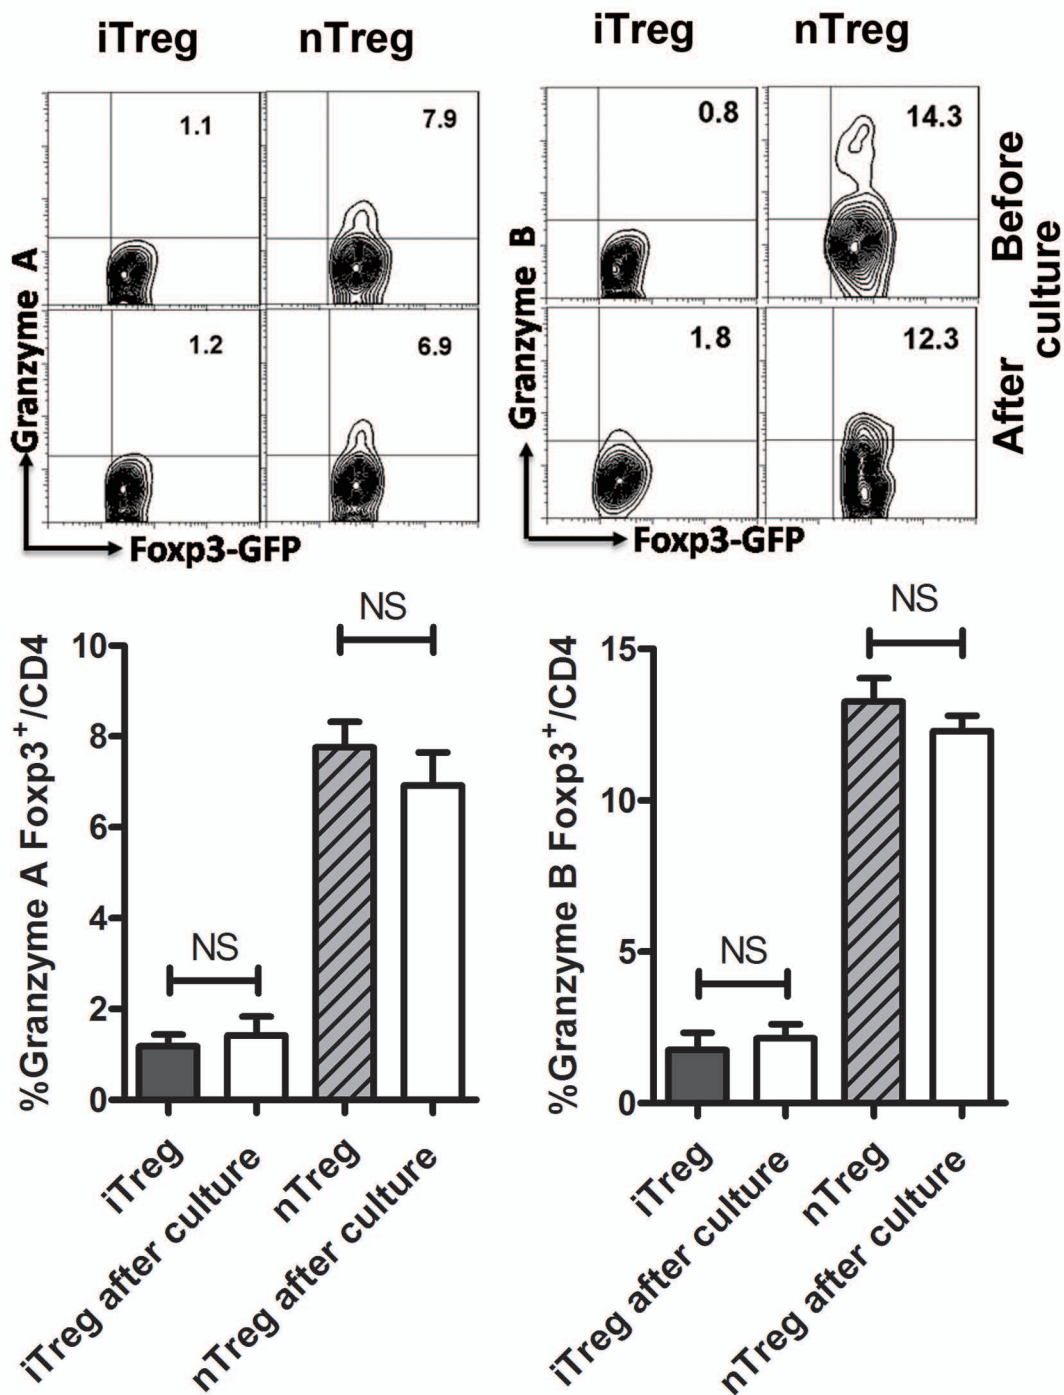

**FIGURE S2.** Granzyme A and Granzyme B expression was not altered after co-cultures in Treg subsets. B cells were stimulated with (Baseline) or without LPS (2  $\mu$ g/ml) (B only) in the presence or absence of nTreg, iTreg and CD4med (ratio of T to B cells was 1:2 to 1:4). Granzyme A and Granzyme B were analyzed on nTreg, iTreg and CD4med before or after co-cultures by flow cytometry. The data indicated Mean  $\pm$  SEM of three separate experiments.

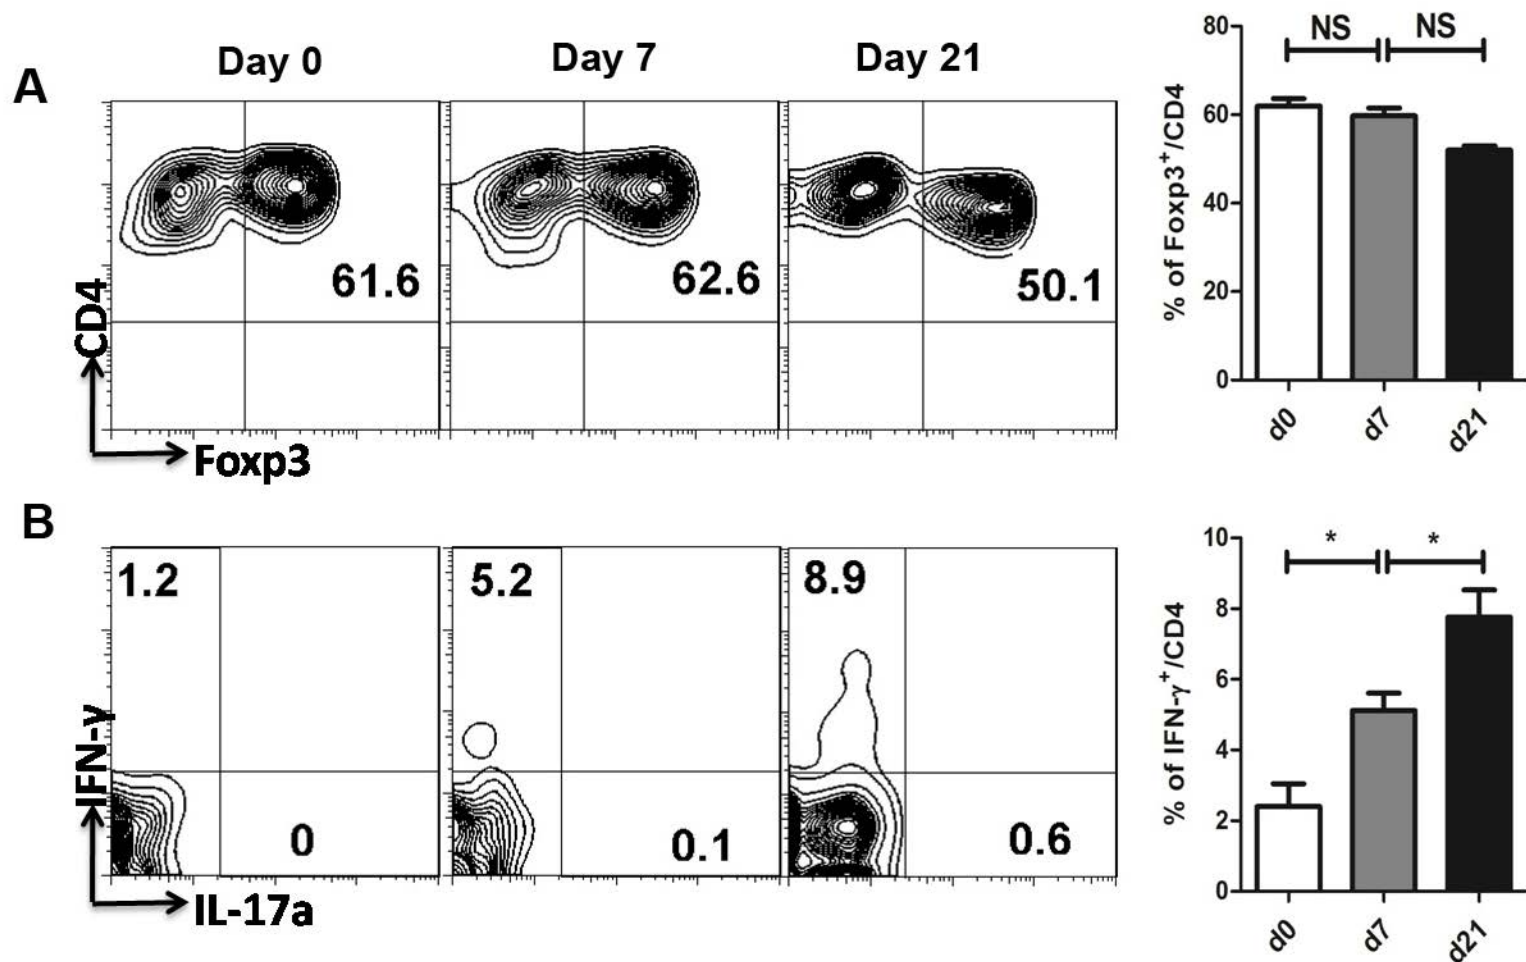

**FIGURE S3.** Stability of iTreg in vivo. **(A and B)** iTreg were generated from splenic naive CD4<sup>+</sup> T cells from C57BL/6 (Foxp3-GFP reporter) mice, and then i.v injected into Rag1<sup>-/-</sup> mice. The mice were sacrificed and spleen cells were harvested at days 7 and 21. The expression of Foxp3, IFN- $\gamma$  and IL-17A in CD4<sup>+</sup> T cells was determined by flow cytometry. There were five mice in each group. The data indicated Mean  $\pm$  SEM of three separate experiments (\* $p$ <0.05).

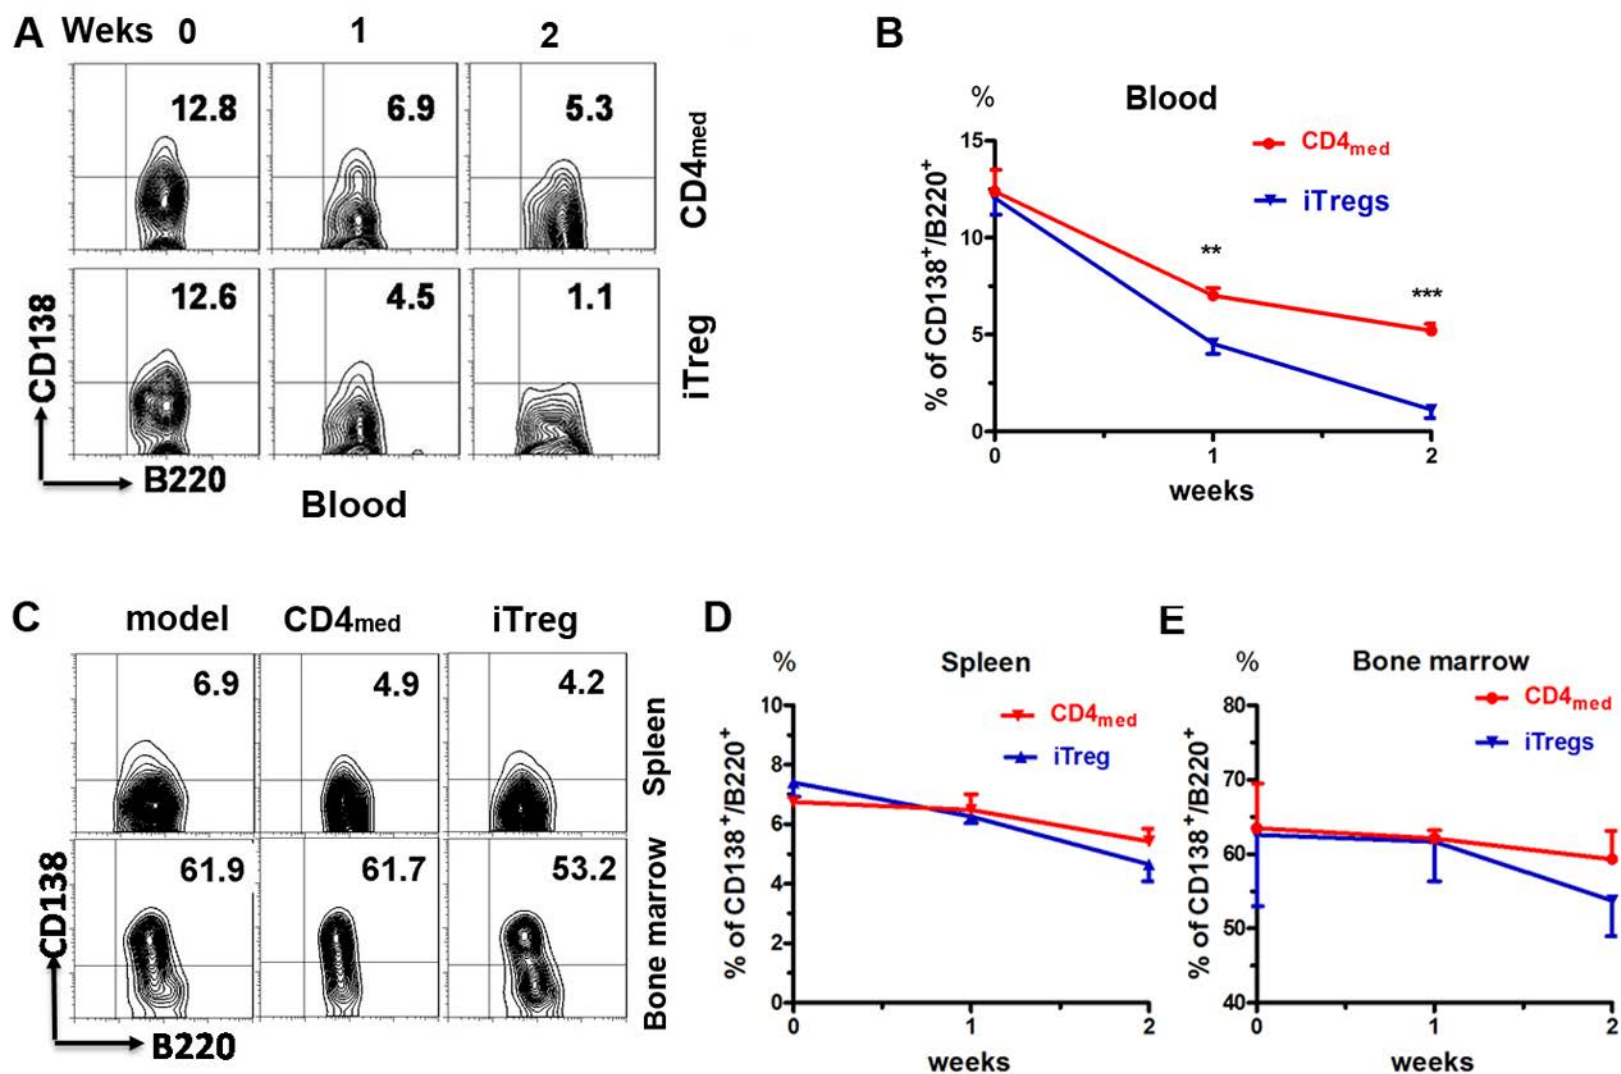

**FIGURE S4.** iTreg subset reduced the frequency of circulating CD138<sup>+</sup> plasma cell in lupus mice. iTreg or CD4<sub>med</sub> cells induced from BWF1 lupus mice with evident disease syndromes were adoptively transferred to established lupus mice, the percentages of CD138<sup>+</sup> plasma cell in blood (**A and B**), spleen and bone marrow (**C-E**) were calculated by flow cytometry. \*\* $p < 0.01$ , \*\*\* $p < 0.001$  means CD4<sub>med</sub> control cell group versus iTreg group at weeks 1, 2 after cell transfer.
